# Supplementary material
Source: publisher site journal article supplement (https://www.oncotarget.com/article/28624)
Supplement: Supplementary file 1 [file 28624]

## Addendum

## Addendum: Disruption of retinol-mediated IL-6 expression in colon cancer-associated fibroblasts: new perspectives on the role of vitamin A metabolism

Romain Villéger<sup>1</sup>, Marina Chulkina<sup>2</sup>, Randy C. Mifflin<sup>3</sup>, Don W. Powell<sup>3,4,5</sup> and Irina V. Pinchuk<sup>2</sup>

<sup>1</sup>Université de Poitiers, UMR CNRS 7267, Ecologie et Biologie des Interactions, France

<sup>2</sup>Department of Medicine at Penn State Health Milton S. Hershey Medical Center, Hershey, PA 17033, USA

<sup>3</sup>Department of Internal Medicine, Division of Gastroenterology and Hepatology, UTMB, Galveston, TX 77555, USA

<sup>4</sup>Institute for Translational Sciences, UTMB, Galveston, TX 77555, USA

<sup>5</sup>Department of Neuroscience and Cell Biology, UTMB, Galveston, TX 77555, USA

**Published:**

**Copyright:** © 2024 Villéger et al. This is an open access article distributed under the terms of the [Creative Commons Attribution License](#) (CC BY 4.0), which permits unrestricted use, distribution, and reproduction in any medium, provided the original author and source are credited.

**This article has an addendum:** This article received a publication fee waiver.

Original article: Oncotarget. 2023; 14:377–381. <https://doi.org/10.18632/oncotarget.28399>
